# Supplementary material for: What might explain deprivation-specific differences in the excess hazard of breast cancer death amongst screen-detected women? Analysis of patients diagnosed in the West Midlands region of England from 1989 to 2011
Source: PubMed Central journal article supplement (PMC5226559; doi:10.18632/oncotarget.10255), 2016-06-23
Supplement: oncotarget-07-49939-s001.pdf [file oncotarget-07-49939-s001.pdf]

# What might explain deprivation-specific differences in the excess hazard of breast cancer death amongst screen-detected women? Analysis of patients diagnosed in the West Midlands region of England from 1989 to 2011

## APPENDIX

|                            |     | Variables included |      |             |                   |                |           |         |                 | Effects included |            |                    |
|----------------------------|-----|--------------------|------|-------------|-------------------|----------------|-----------|---------|-----------------|------------------|------------|--------------------|
|                            |     | Age                | Year | Deprivation | Extent of disease | Size of tumour | Histology | Surgery | Time to surgery | Charlson score   | Non-linear | Time-varying       |
| <b>Screen-detected</b>     |     |                    |      |             |                   |                |           |         |                 |                  |            |                    |
| Set number                 | 1   | Y                  | Y    | Y           | Y                 | Y              | Y         | Y       | N               | Y                | None       | Age (1 df)         |
|                            | 2*  | Y                  | Y    | Y           | Y                 | Y              | Y         | Y       | N               | Y                | None       | None               |
|                            | 3*  | Y                  | Y    | Y           | Y                 | Y              | Y         | Y       | N               | Y                | None       | None               |
|                            | 4   | Y                  | Y    | Y           | Y                 | Y              | Y         | Y       | N               | Y                | None       | Deprivation (1 df) |
|                            | 5*  | Y                  | Y    | Y           | Y                 | Y              | Y         | Y       | N               | Y                | None       | None               |
|                            | 6*  | Y                  | Y    | Y           | Y                 | Y              | Y         | Y       | N               | Y                | None       | None               |
|                            | 7*  | Y                  | Y    | Y           | Y                 | Y              | Y         | Y       | N               | Y                | None       | None               |
|                            | 8*  | Y                  | Y    | Y           | Y                 | Y              | Y         | Y       | N               | Y                | None       | None               |
|                            | 9*  | Y                  | Y    | Y           | Y                 | Y              | Y         | Y       | N               | Y                | None       | None               |
|                            | 10* | Y                  | Y    | Y           | Y                 | Y              | Y         | Y       | N               | Y                | None       | None               |
| <b>Non-screen-detected</b> |     |                    |      |             |                   |                |           |         |                 |                  |            |                    |
|                            |     | Y                  | Y    | Y           | Y                 | Y              | Y         | Y       | Y               | Y                | Age (2 df) | Age (1 df)         |

**Key:** Y Variable included in the specification

N Variable not included in the specification

\* Selected specification for screen-detected group (identical in 8 out of 10 datasets)

**Appendix A: Model specifications derived from decision tree for screen-detected and non-screen detected women.**
